# Supplementary material for: Tuning interfacial *H coverage and aldehyde adsorption configuration for selective electrocatalytic hydrogenation of furfural
Source: Royal Society of Chemistry journal article supplement (doi:10.1039/d5ta00403a), 2025-01-01
Supplement: d5ta00403a1.pdf [file d5ta00403a1.pdf]

## Supporting Information

### **Tuning interfacial \*H coverage and aldehyde adsorption configuration for selective electrocatalytic hydrogenation of furfural**

Min Zheng, Pengtang Wang, Yingjie Gao, Chen Peng, Yao Zheng\*, Shi-Zhang Qiao\*

School of Chemical Engineering, The University of Adelaide, Adelaide, SA 5005, Australia

\*Corresponding authors

Email addresses: yao.zheng01@adelaide.edu.au (Y. Zheng), s.qiao@adelaide.edu.au (S.-Z. Qiao)

## Supplementary procedures

### Chemicals

Palladium (II) acetylacetonate ( $\text{Pd}(\text{acac})_2$ ), copper (II) chloride ( $\text{CuCl}_2$ ), iron (III) chloride hexahydrate ( $\text{FeCl}_3 \cdot 6\text{H}_2\text{O}$ ), oleylamine ( $\text{C}_{18}\text{H}_{35}\text{NH}_2$ ), acetone ( $\text{C}_3\text{H}_6\text{O}$ ), ethanol ( $\text{C}_2\text{H}_6\text{O}$ ), cyclohexane ( $\text{C}_6\text{H}_{12}$ ), and ascorbic acid ( $\text{C}_6\text{H}_8\text{O}_6$ ) were purchased from Sigma-Aldrich without further purification. Commercial Pd/C (20 wt%), carbon paper and Nafion 117 membrane (Dupont) were purchased from The Fuel Cell Store, USA. Milli-Q ultrapure water (18.2  $\text{M}\Omega \cdot \text{cm}$ ) was used in all experiments.

### In situ surface-enhanced Raman spectroscopy (SERS)

In situ SERS was conducted on a Renishaw inVia Qontor confocal Raman spectrometer with a 532 nm solid laser as the excitation source. The measurements were carried out on a screen-printed microelectrode (Pine Research RRPE1002C) with three-electrode configuration. The working electrode was fabricated by drop-casting catalysts onto the screen-printed electrode. A carbon electrode and an Ag/AgCl were used as the counter electrode and the reference electrode, respectively. The Raman spectrum of each scan was accumulated by 2 acquisitions (20 s per acquisition)

### In situ attenuated total reflectance Fourier transform infrared spectroscopy (ATR-FTIR)

ATR-FTIR was performed on a Thermo-Fisher Nicolet iS50R spectrometer equipped with a liquid nitrogen-cooled HgCdTe (MCT) detector and a VeeMax III ATR accessory (Pike Technologies). A germanium prism coated with catalysts by air-brushing was used as the working electrode and was mounted in a custom-made three-electrode electrochemical cell. A saturated Ag/AgCl and a Pt wire were used as the reference electrode and the counter electrode, respectively. For each spectrum, the data were acquired by averaging 64 scans collected at a spectral resolution of  $4 \text{ cm}^{-1}$ . For furfural hydrogenation, the electrolyte used was  $\text{H}_2\text{SO}_4$  solution with different pH values containing 20 mM furfural and was constantly purged with Ar during the experiment. The chronoamperometric tests were conducted from the potential range of 0 to  $-0.4 \text{ V}$  vs RHE. The spectra recorded under open circuit potential were used as background measurements. The spectra were processed in the OMNIC software.

## Supplementary Figures and Tables

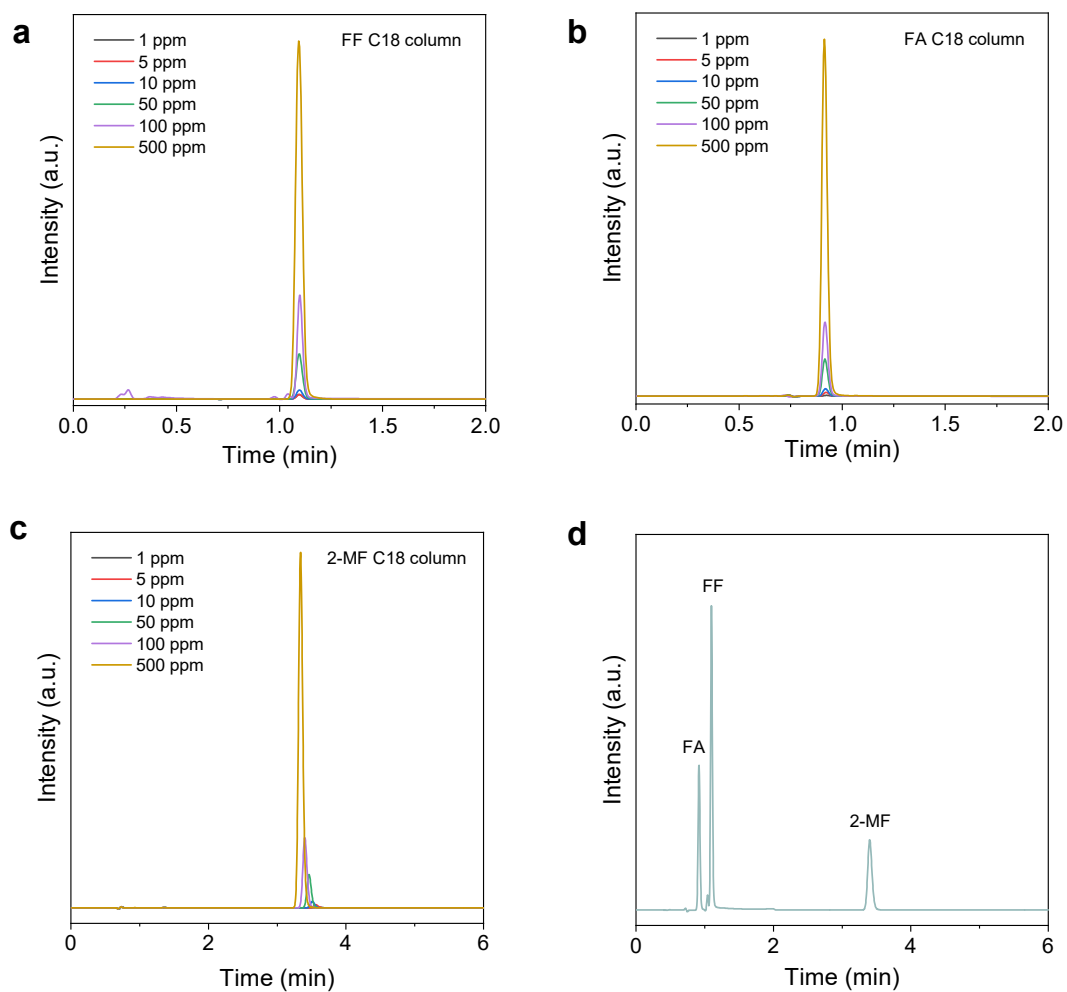

**Figure S1.** The standard calibration curves of (a) FF, (b) FA, and (c) 2-MF. (d) HPLC curve of all liquid chemicals.

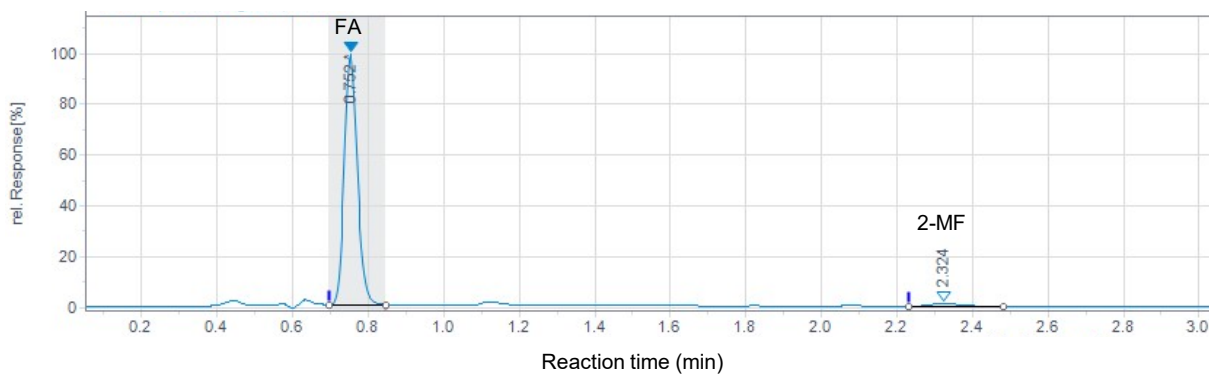

**Figure S2.** Electrocatalytic reduction of FA to 2-MF with a conversion efficiency of 2.1%.

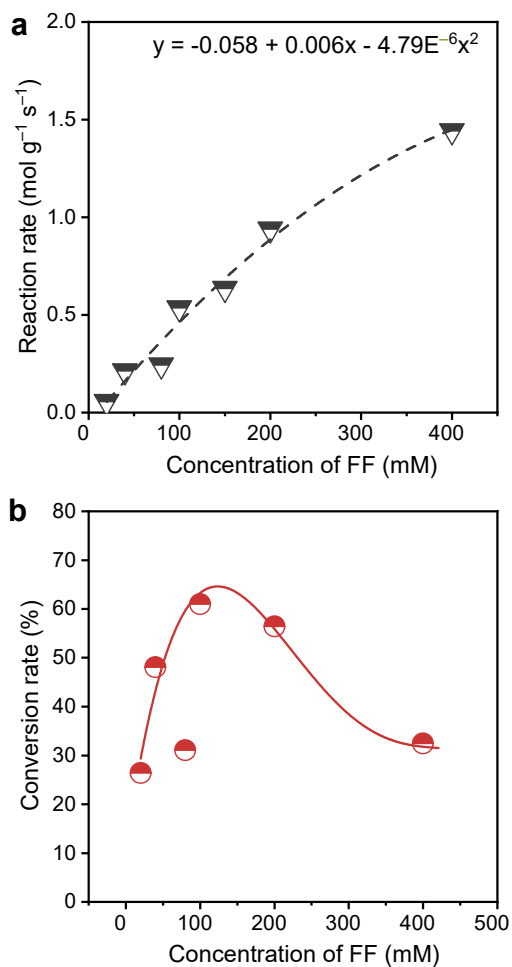

**Figure S3.** (a) Reaction rate, (b) conversion rate, and corresponding fitting results of FF ECH.

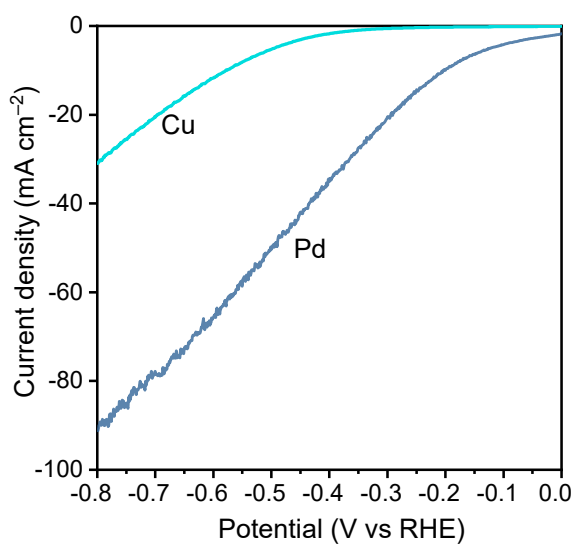

**Figure S4.** Linear sweep voltammetry curves of Cu and Pd for FF ECH.

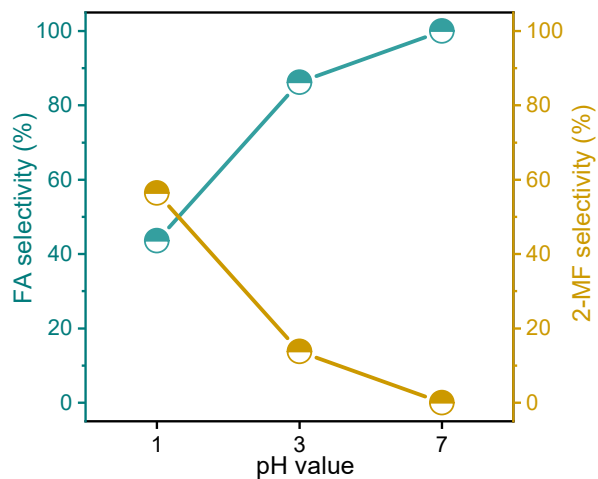

**Figure S5.** Selectivity of FA and 2-MF production in different pH solutions.

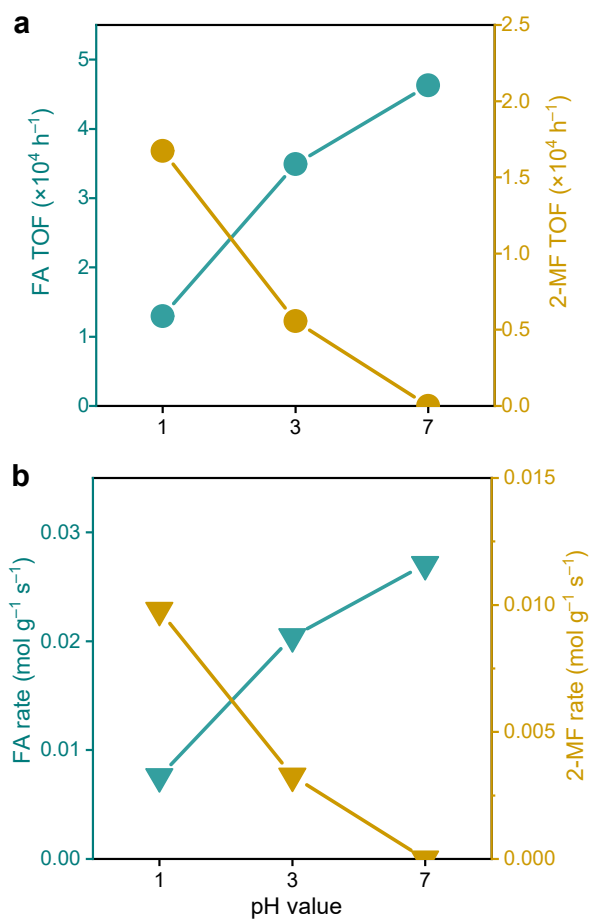

**Figure S6.** (a) TOF of FA and 2-MF, (b) the production rate of FA and 2-MF in solutions with different pH.

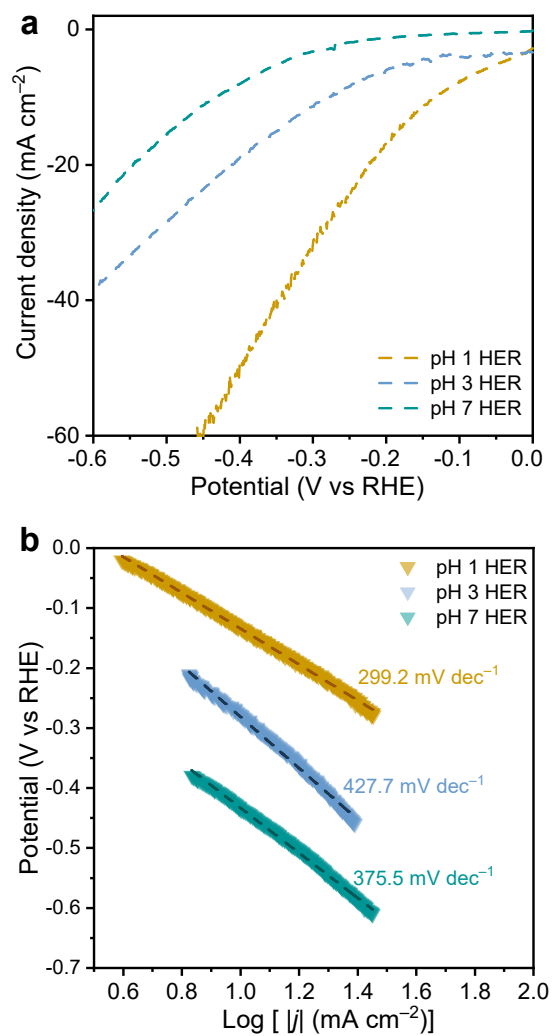

**Figure S7.** (a) The LSV curves for HER. (b) Tafel plots for HER in different pH solutions.

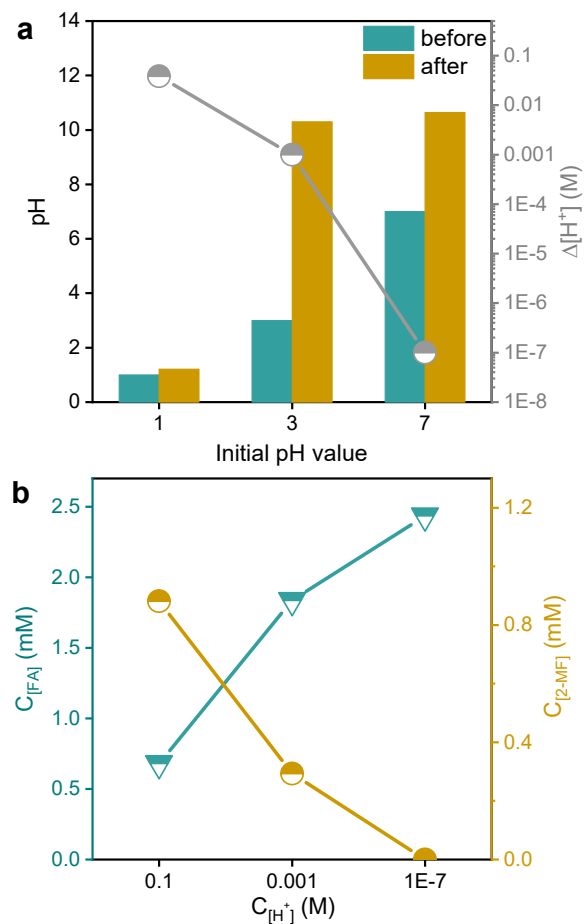

**Figure S8.** (a) Detection of pH values before and after reaction and consumption of  $\text{H}^+$  concentration for different pH solutions. (b) The change in FA and 2-MF concentration as a function of  $\text{H}^+$  concentration.

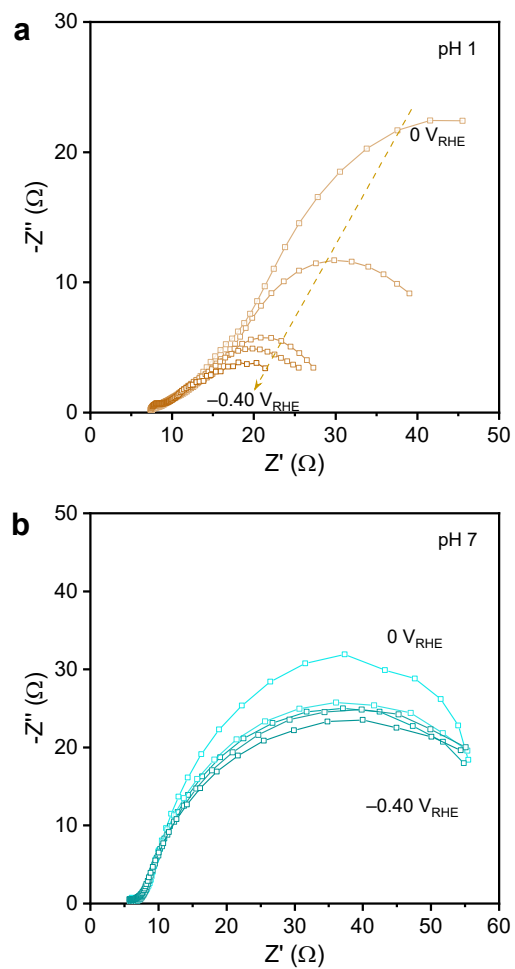

**Figure S9.** (a) EIS Nyquist circles under different potentials for pH 1. (b) EIS Nyquist circles under different potentials for pH 7.



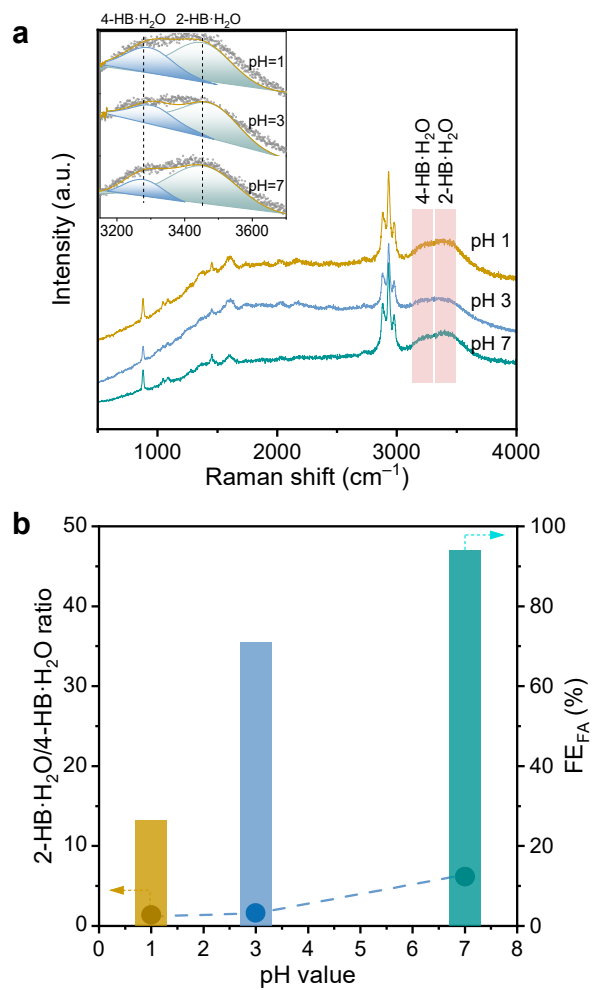

**Figure S10.** (a) SERS spectra for Pd/C catalyst in different pH (Inset: fitting of water peaks). (b) Calculated 2-HB·H<sub>2</sub>O/4-HB·H<sub>2</sub>O ratio and FE of FA as a function of pH.

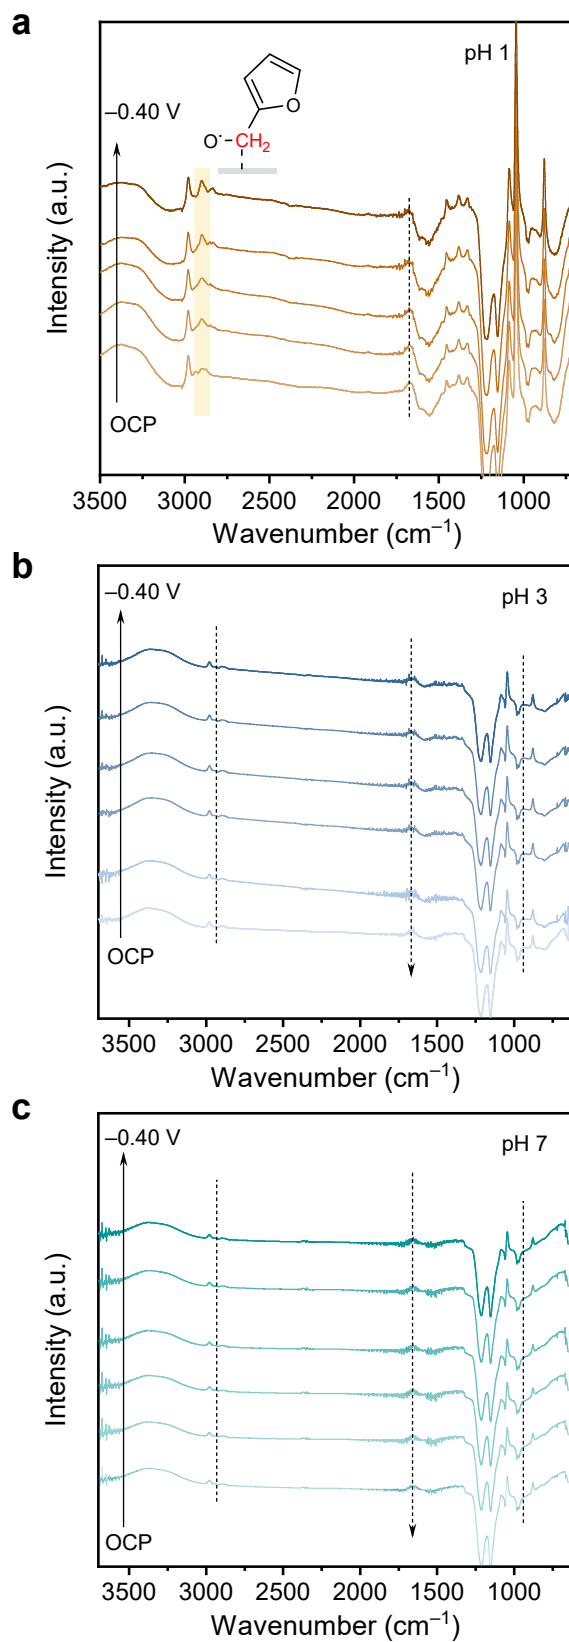

**Figure S11.** In situ ATR-FTIR spectra for furfural electrohydrogenation in  $\text{H}_2\text{SO}_4/\text{Na}_2\text{SO}_4$  mixed solution with (a) pH 1, (b) pH 3, and (c) pH 7.

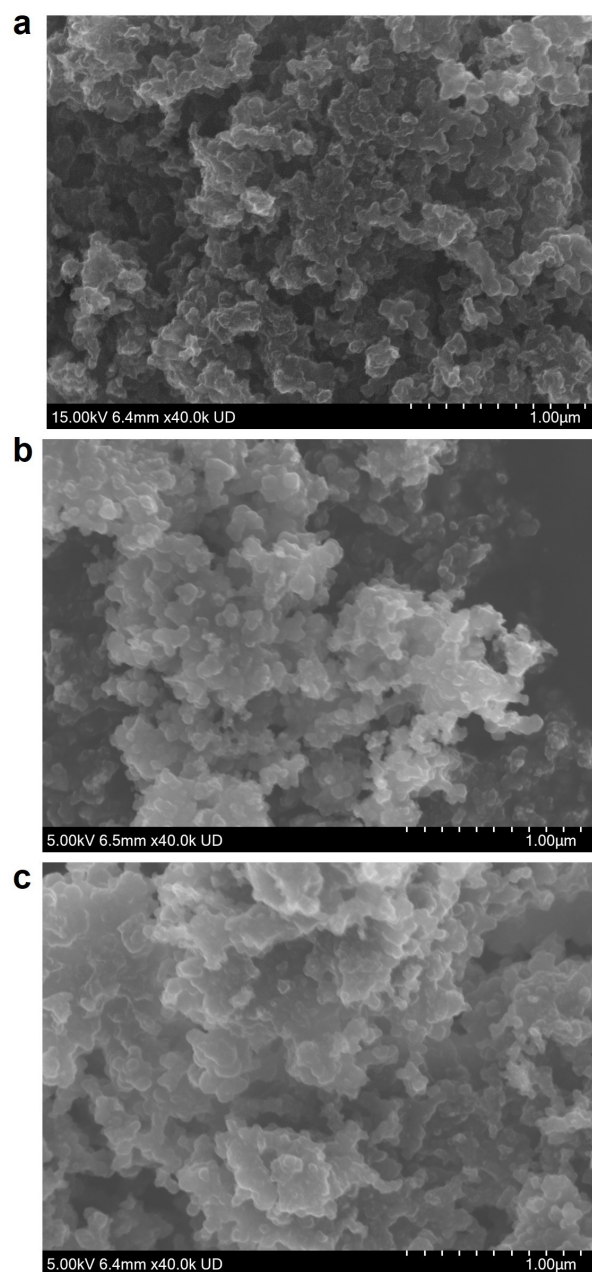

**Figure S12.** SEM images of (a) PdCu<sub>0.5</sub>, (b) PdCu<sub>1</sub>, and (c) PdCu<sub>2</sub>.

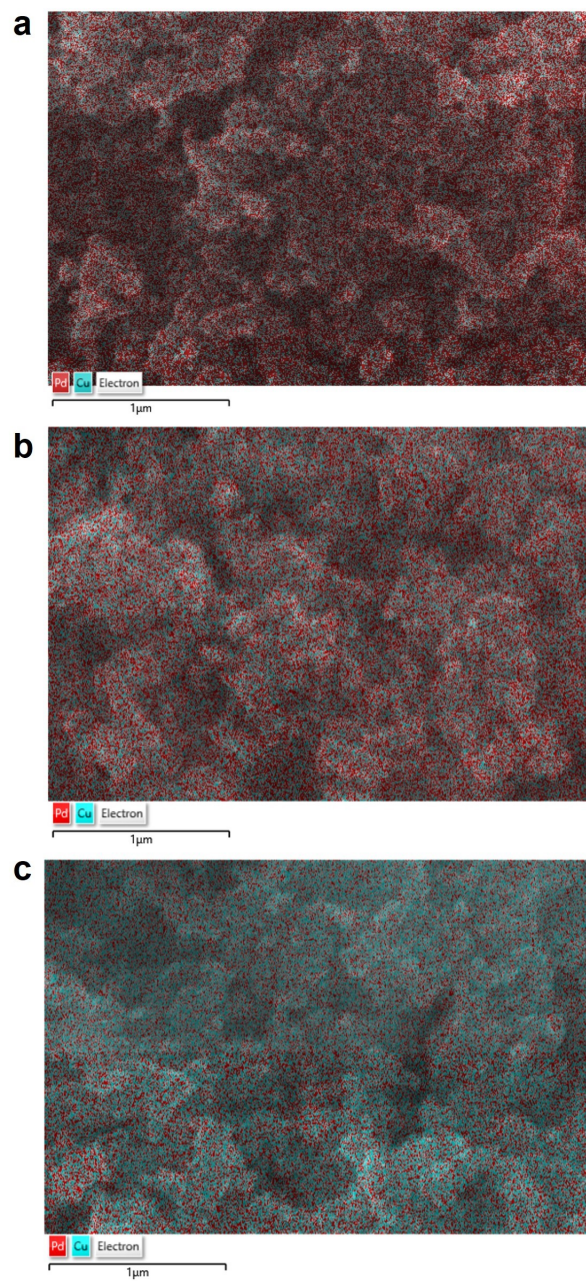

**Figure S13.** SEM mapping images of (a) PdCu<sub>0.5</sub>, (b) PdCu<sub>1</sub>, and (c) PdCu<sub>2</sub>.



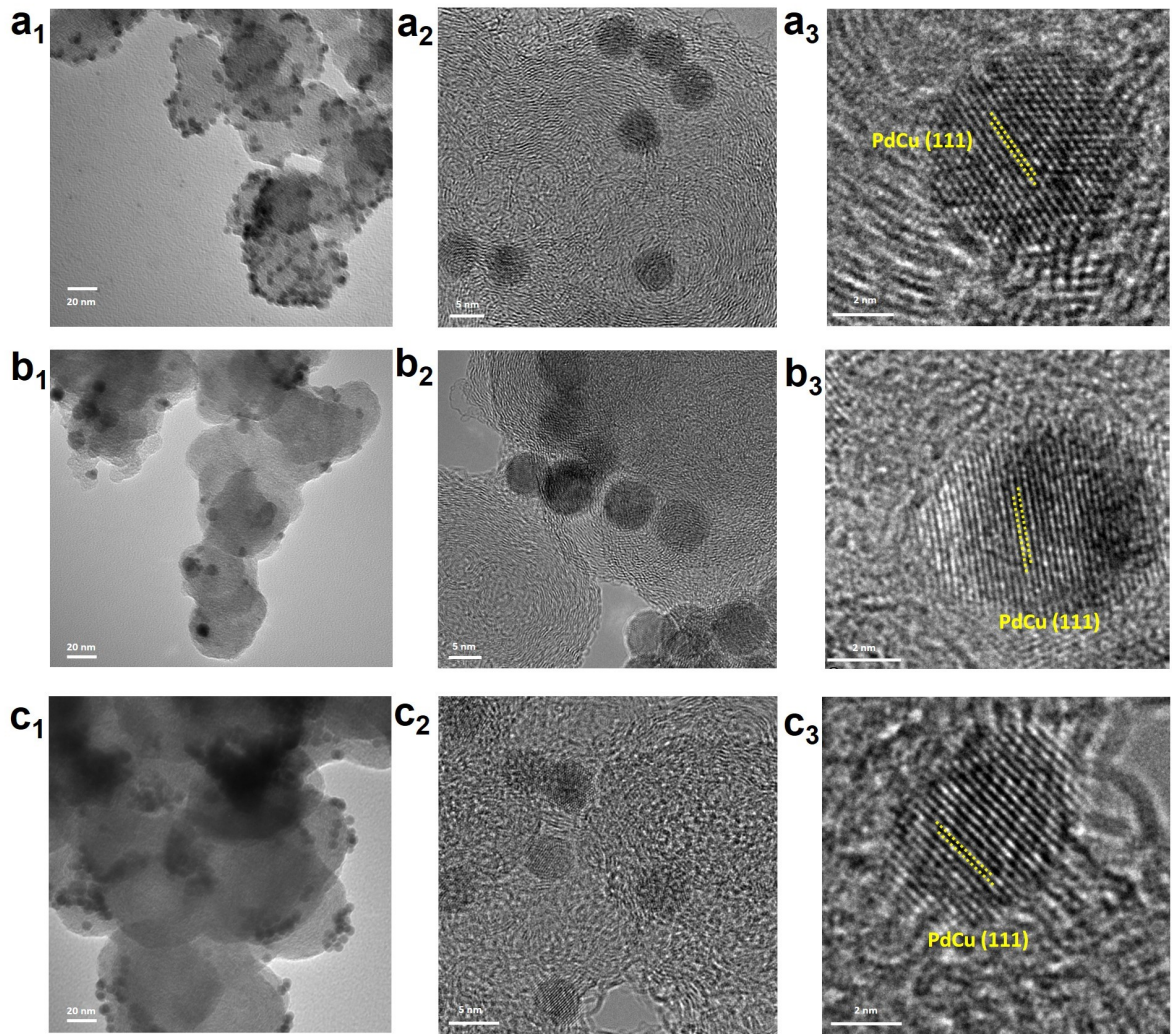

**Figure S14.** TEM and HR-TEM images of (a<sub>1</sub>-a<sub>3</sub>) PdCu<sub>0.5</sub>, (b<sub>1</sub>-b<sub>3</sub>) PdCu<sub>1</sub>, and (c<sub>1</sub>-c<sub>3</sub>) PdCu<sub>2</sub>.

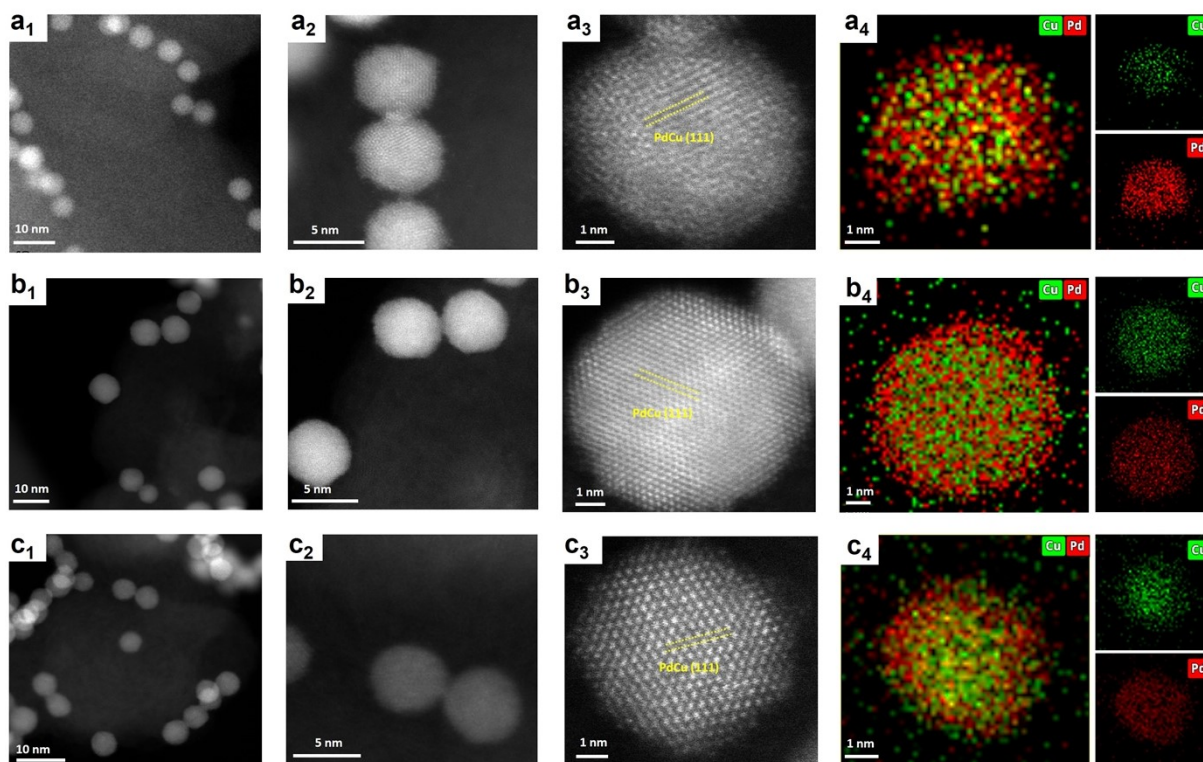

**Figure S15.** HAADF-STEM images with EDS element mapping of PdCu<sub>x</sub> alloy: (a<sub>1</sub>-a<sub>4</sub>) PdCu<sub>0.5</sub>, (b<sub>1</sub>-b<sub>4</sub>) PdCu<sub>1</sub>, and (c<sub>1</sub>-c<sub>4</sub>) PdCu<sub>2</sub>.

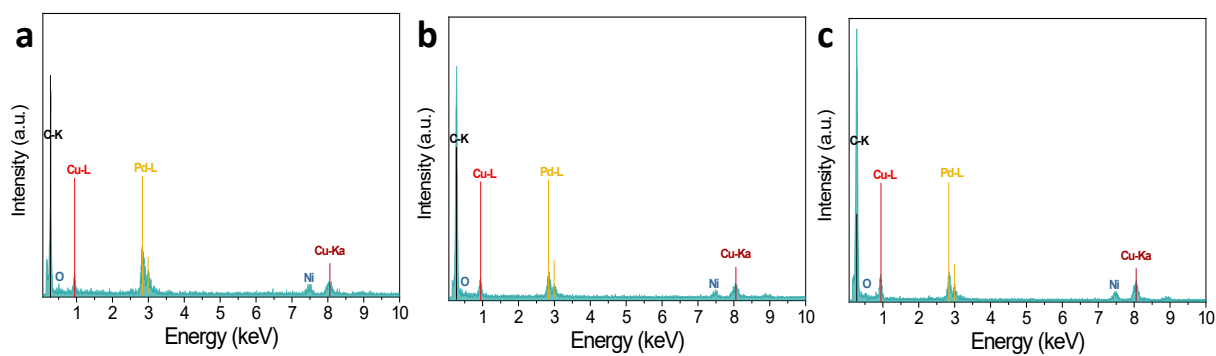

**Figure S16.** EDS spectra of (a) PdCu<sub>0.5</sub>, (b) PdCu<sub>1</sub> and (c) PdCu<sub>2</sub>.

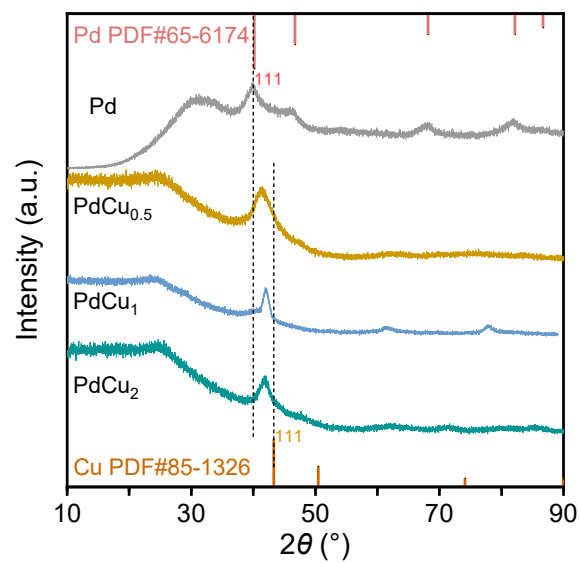

**Figure S17.** XRD patterns of Pd and PdCu<sub>x</sub>.

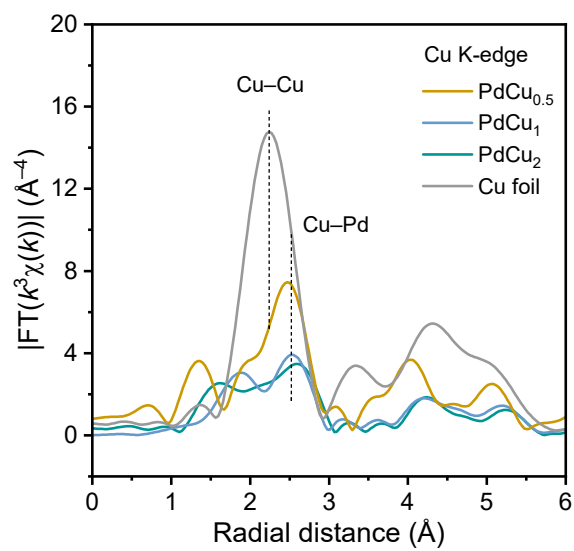

**Figure S18.** Cu K-edge FT-EXAFS spectra for PdCu<sub>x</sub> and reference samples.

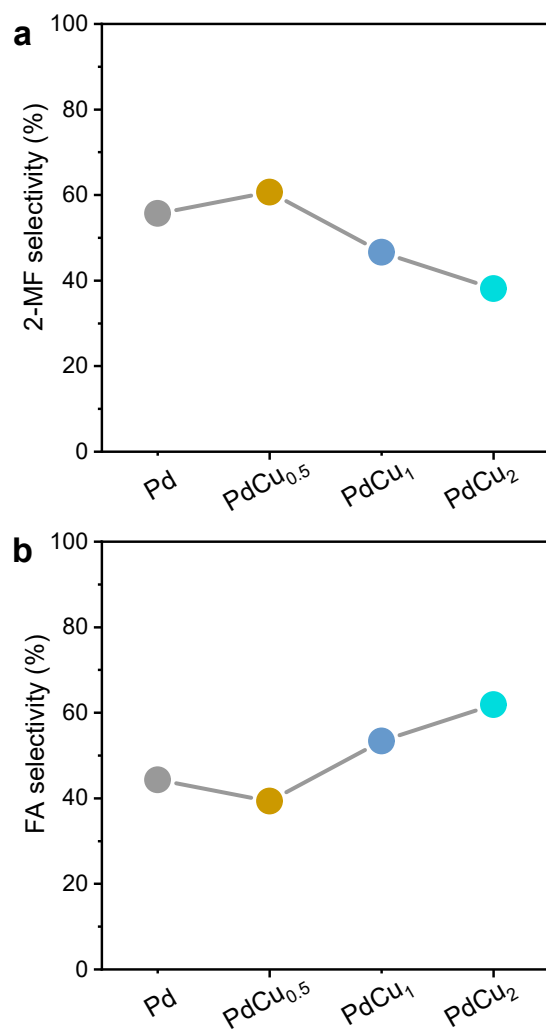

**Figure S19.** Selectivity of (a) 2-MF and (b) FA in Pd and PdCu<sub>x</sub> alloy catalysts.



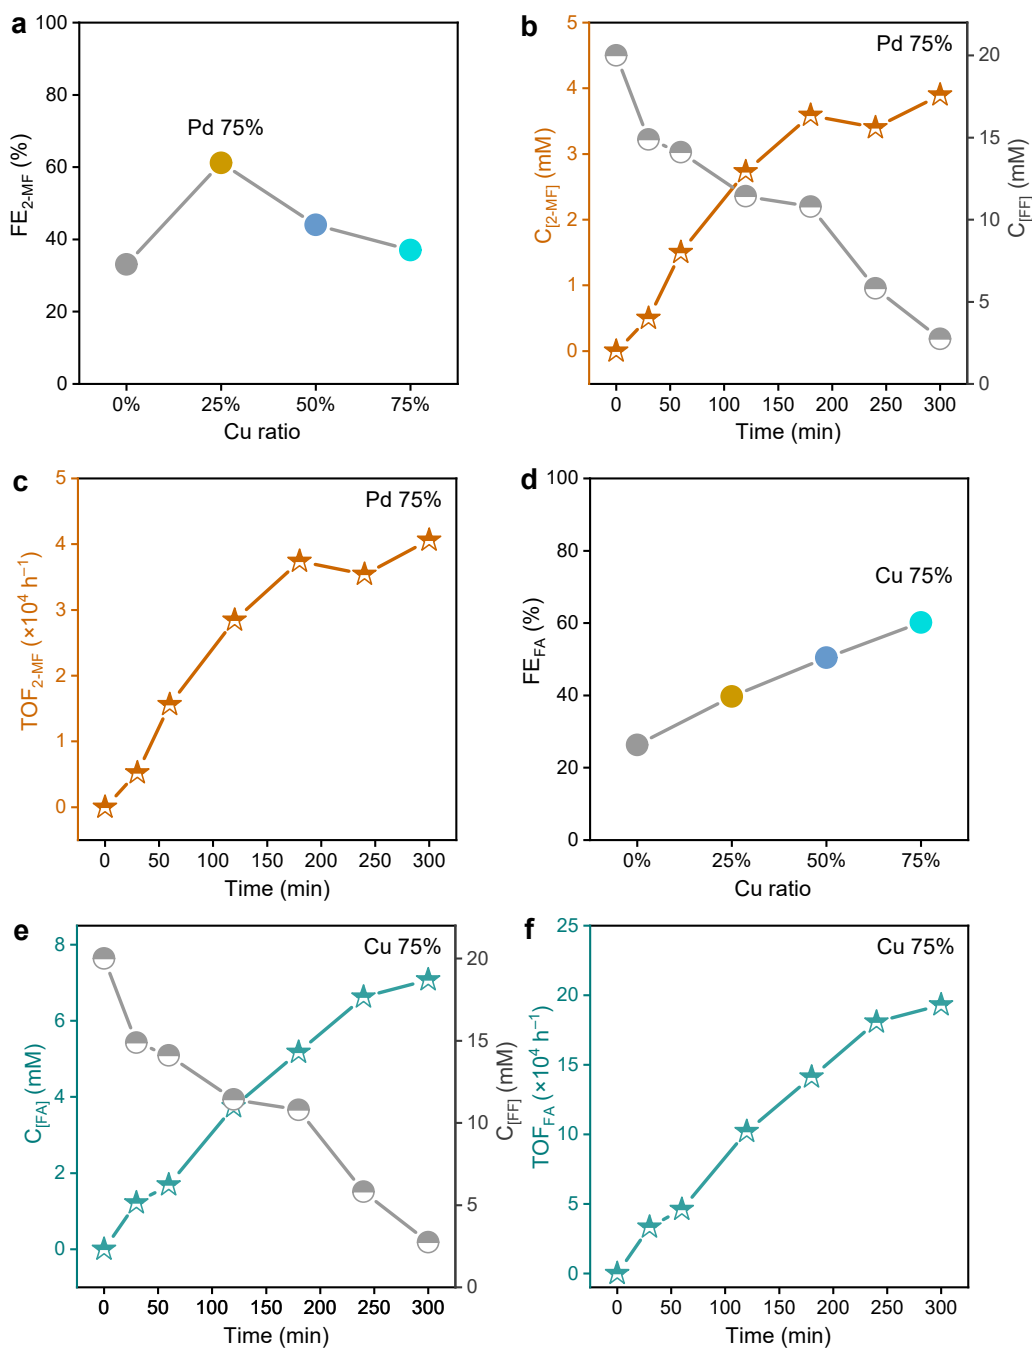

**Figure S20.** (a) FE of 2-MF via varying Cu and Pd ratio. (b) Concentration of produced 2-MF on Pd-rich electrode (PdCu<sub>0.5</sub>; Pd 75%) at different reaction time. (c) TOF of 2-MF on Pd-rich electrode at different reaction time. (d) FE of FA via varying Cu concentration. (e) Concentration of produced FA on Cu-rich electrode (PdCu<sub>2</sub>; 75%) at different reaction time. (f) TOF of FA on Cu-rich electrode at different reaction time.

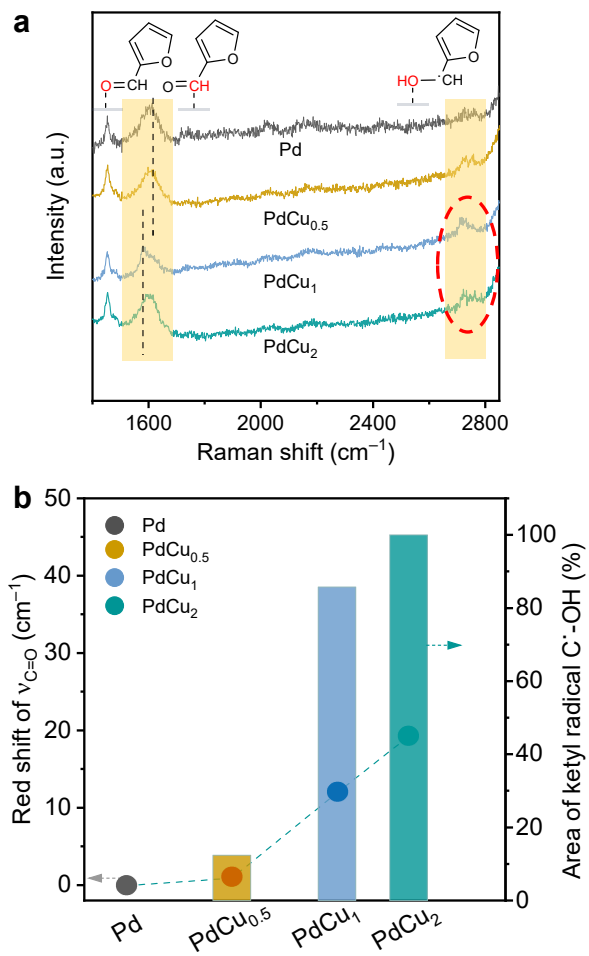

**Figure S21.** (a) Raman spectra of Pd and PdCu<sub>x</sub>. (b) Calculated red shift of  $\nu_{C=O}$  and detected ketyl radical R-C<sup>·</sup>-OH.

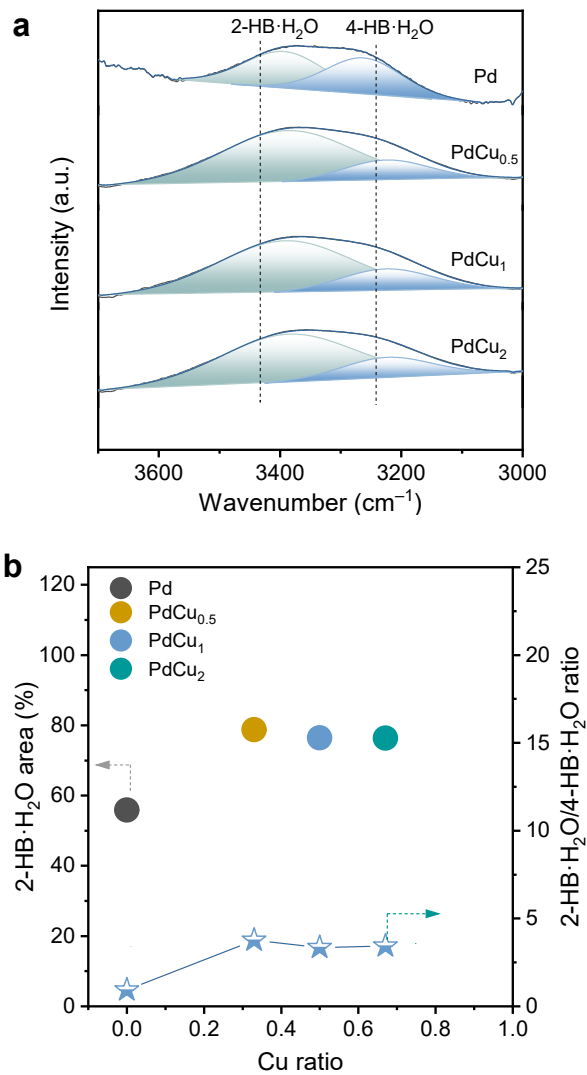

**Figure S22.** (a) The analysis of H<sub>2</sub>O peak on ATR-FTIR spectra. (b) Calculated 2-HB·H<sub>2</sub>O and 2-HB·H<sub>2</sub>O/4-HB·H<sub>2</sub>O ratio.

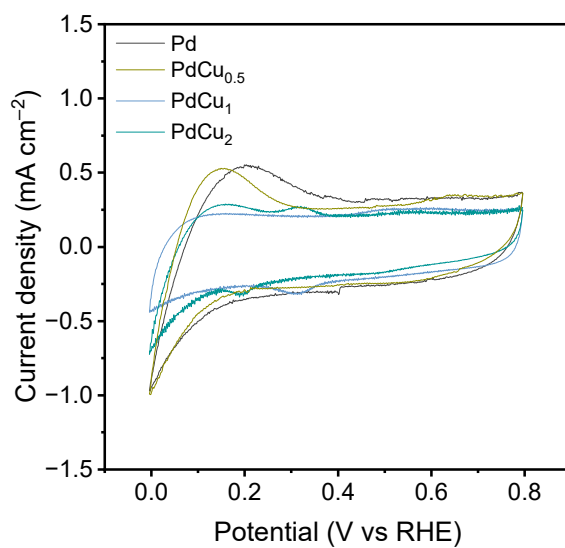

**Figure S23.** Typical Pb UPD CV curves for Pd and PdCu<sub>x</sub> at a scan rate of 50 mV s<sup>-1</sup>.

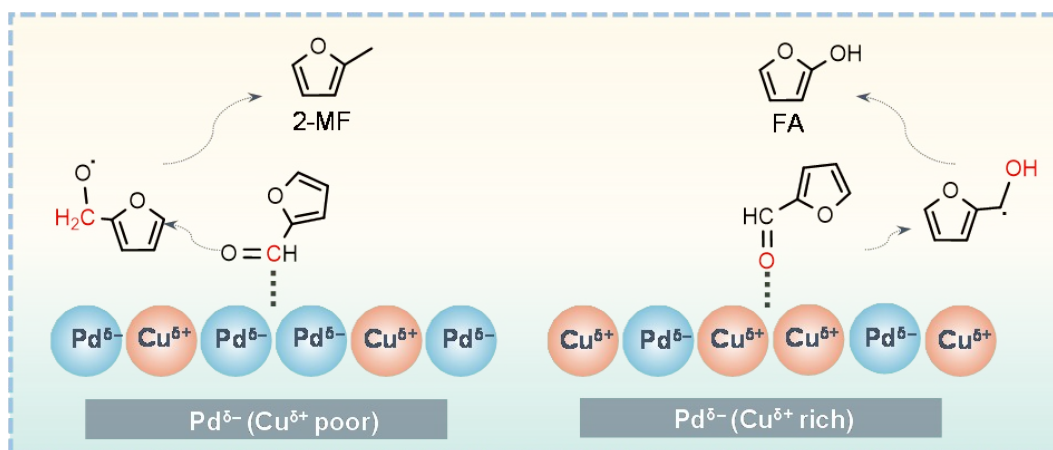

**Figure S24.** Schematic illustration of FF ECH selectivity control via adjusting FF adsorption configuration on tuned catalyst surfaces.

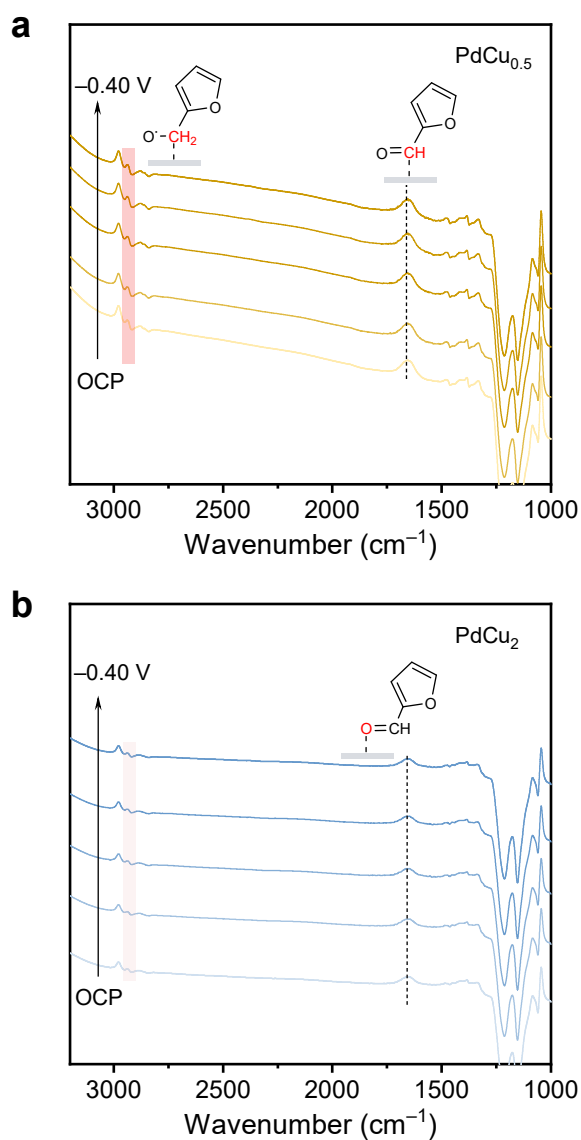

**Figure S25.** In situ ATR-FTIR recorded in  $\text{H}_2\text{SO}_4$  with 20 mM furfural for (a)  $\text{PdCu}_{0.5}$  and (b)  $\text{PdCu}_2$ .

**Table S1.** The Pd/Cu atomic ratio of the catalysts determined by EDX elemental mapping.

| Catalyst            | Pd/Cu ratio |
|---------------------|-------------|
| PdCu <sub>0.5</sub> | 2.2:1       |
| PdCu <sub>1</sub>   | 1:1         |
| PdCu <sub>2</sub>   | 1:1.9       |
